# Supplementary material
Source: Springer Nature journal article supplement (https://www.springermedizin.de/resource/supplementary/13012_2013_737_MOESM4_ESM.pdf/9630570)

■ Intervention (Patients and professionals)

■ Control (Professionals only)

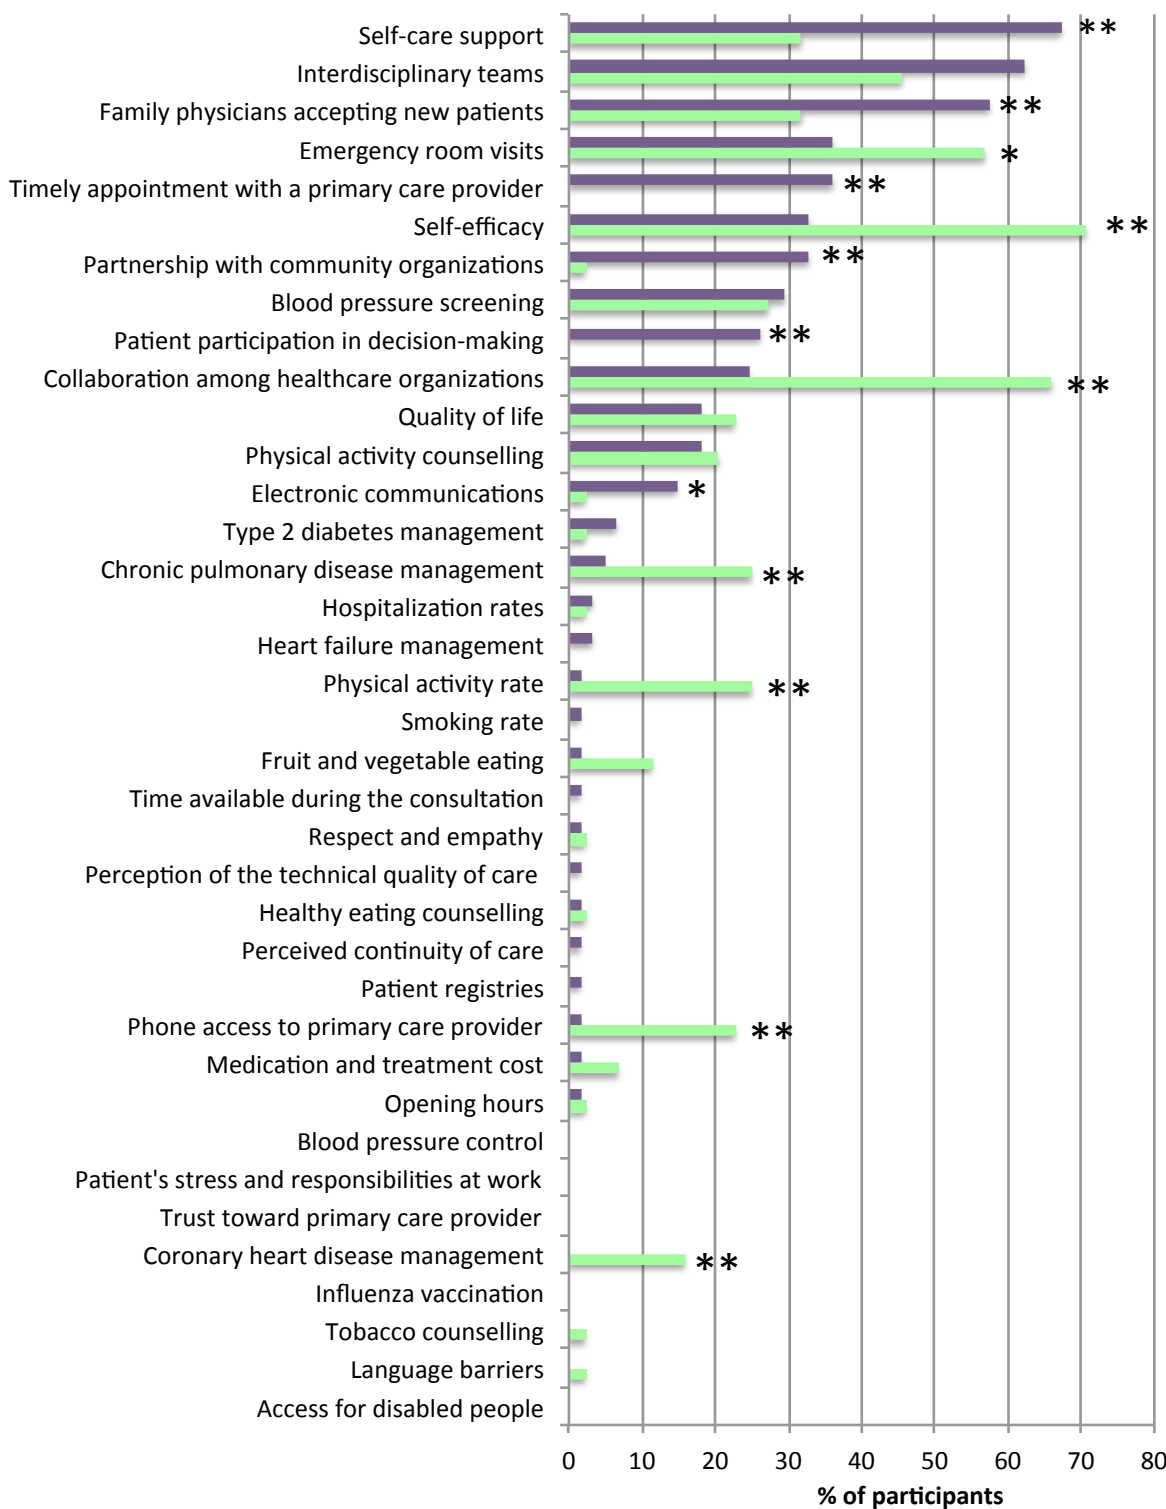

% of participants

Supplement: MOESM4 [file 9630570]
